# Supplementary material
Source: publisher figshare collection journal article supplement (https://acs.figshare.com/ndownloader/files/6908552)
Supplement: Supplementary file 1 [file 6908552]

## Supporting information for:

### Convergence and Sampling in Determining Free Energy Landscapes for Membrane Protein Association

*Jan Domański, George Hedger, Robert B. Best, Phillip J. Stansfeld and Mark S. P. Sansom*

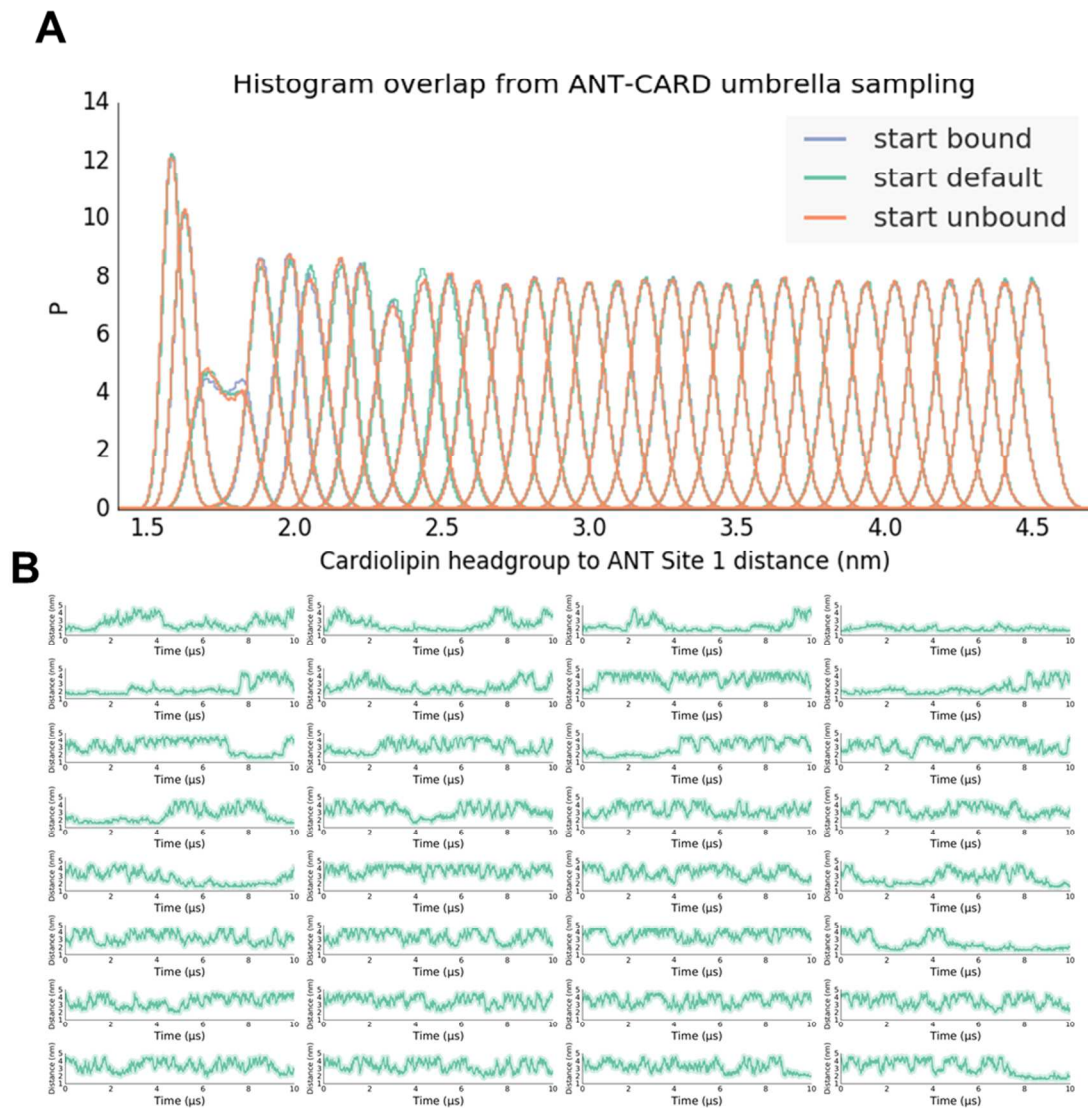

SI Figure S1:

(A) Histogram overlap for the ANT/CL distance-based collective variable, starting from three different initial configurations. (B) Continuous trajectories through the replica space, started from the default initial condition, showing multiple binding and unbinding events of the ANT/CL complex.

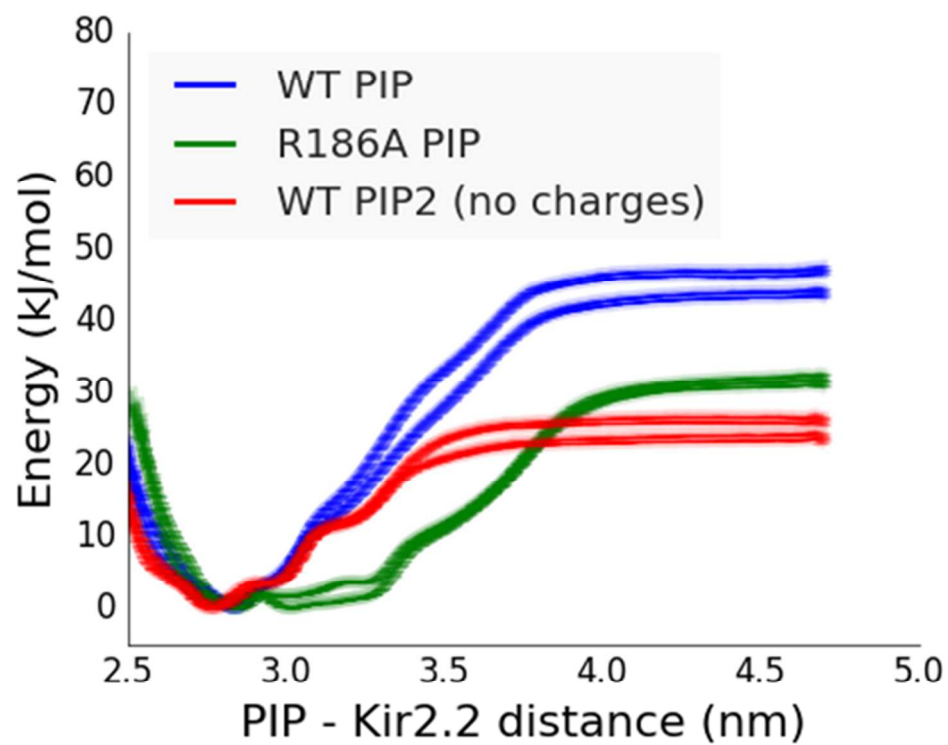

*SI Figure 2:*

Kir2.2/PIP<sub>2</sub> binding PMFs for the wild-type (blue) vs. R186A mutant (green) Kir2.2 and for the wild-type Kir2.2 with a neutral PIP<sub>2</sub> model (red).

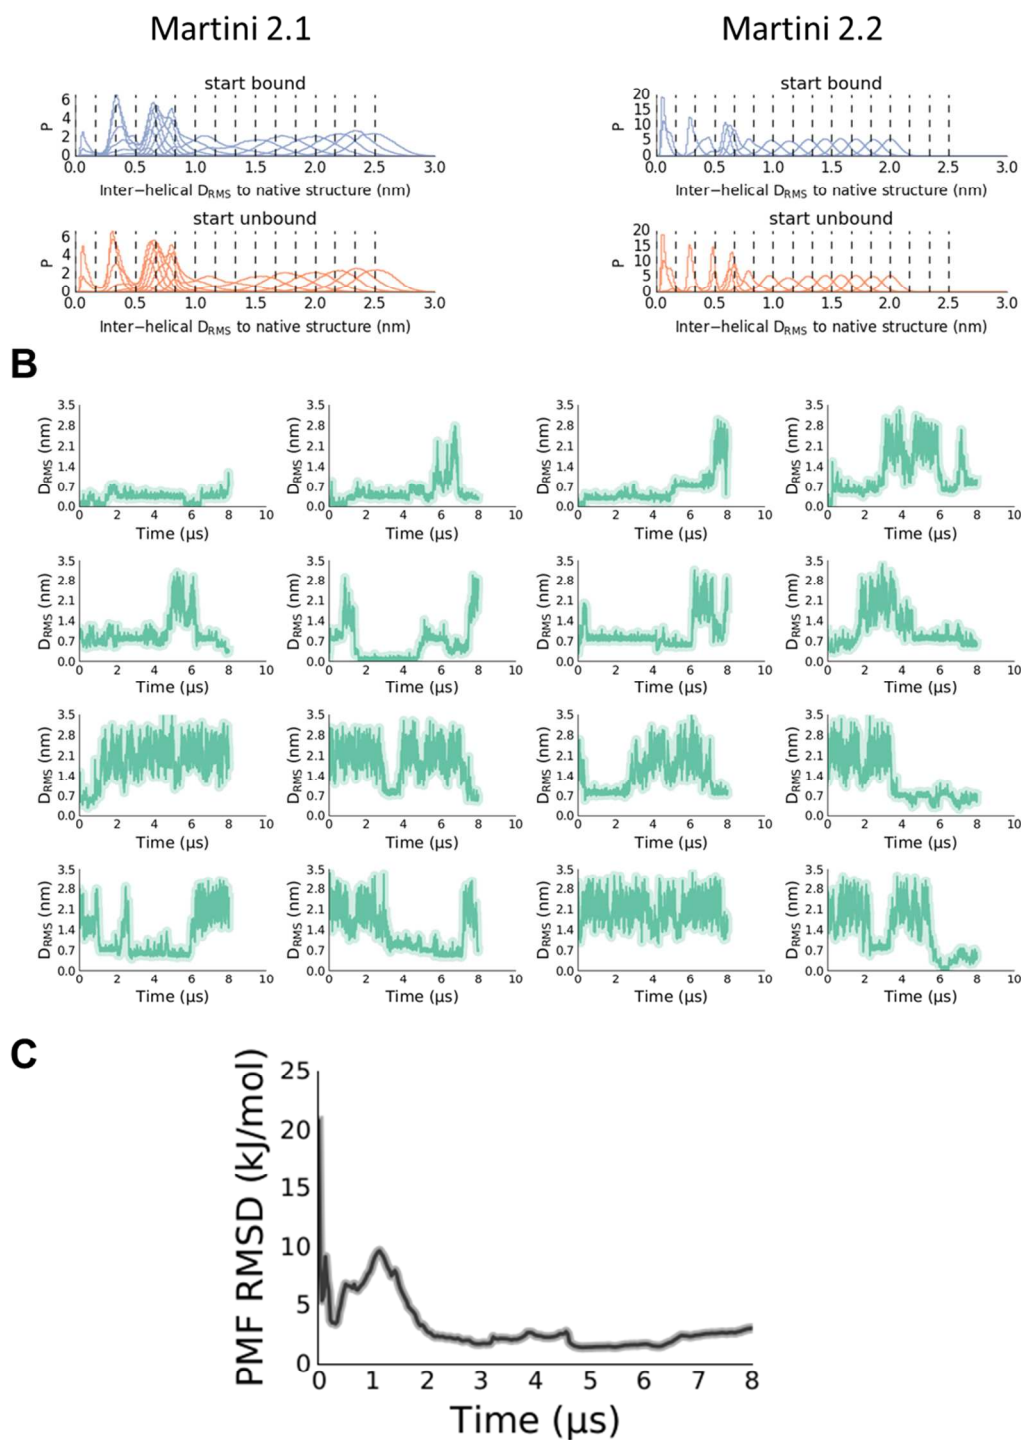

**SI Figure 3:**

Sampling and convergence of the glycoporphin dimer.  $D_{RMS}$  histograms for starting from all bound and all unbound condition for Martini 2.1 (A, left panel) and Martini 2.2 (A, right panel). (B) Continuous trajectories through replica space for glycoporphin dimerization PMFs, showing multiple binding and unbinding events, starting from the default initial condition. (C) RMSD of PMF starting from all bound and all unbound initial conditions.

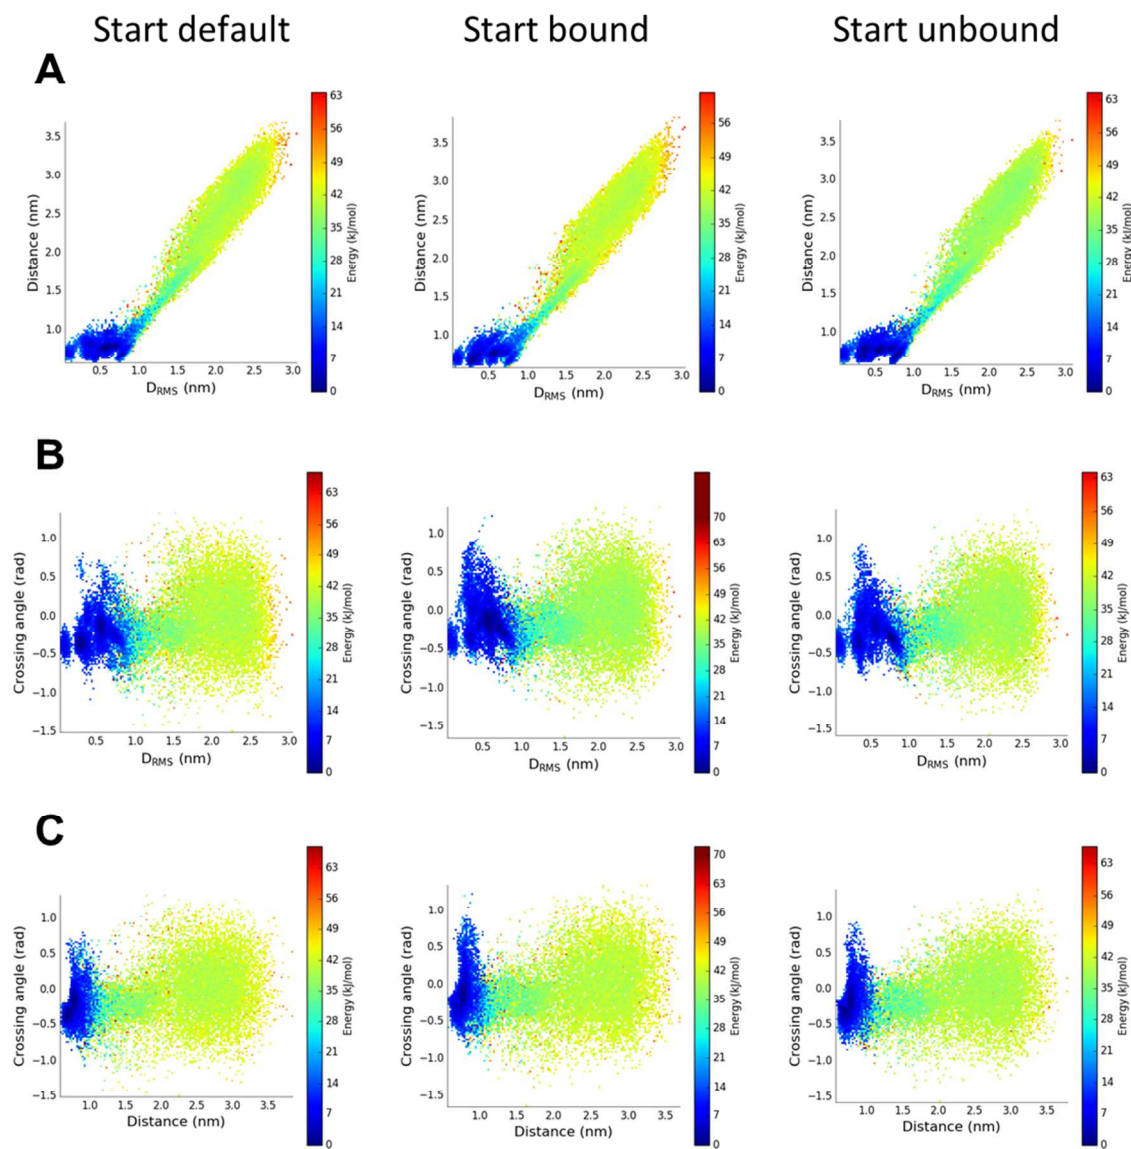

*SI Figure 4:*

2D PMFs of glycoporphin dimerization projected on different collective variables, starting from 3 different initial conditions: (A) distance vs.  $D_{RMS}$ ; (B) crossing angle vs.  $D_{RMS}$ ; and (C) crossing angle vs. distance

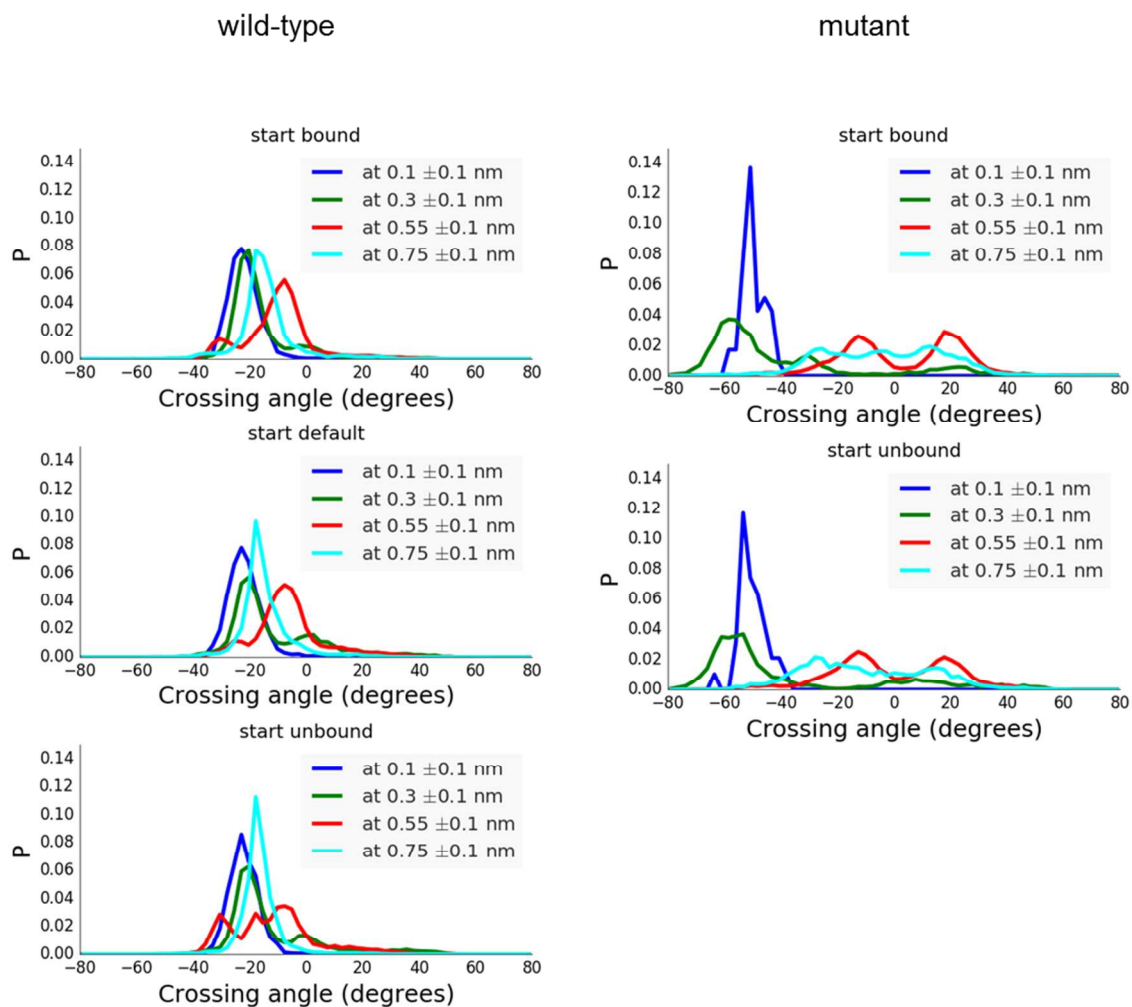

*SI Figure 5:*

Crossing angle distributions for different minima on the dimerization PMF of glycoporphin, wild-type (left panel) and G83L mutant (right panel) with Martini 2.1.

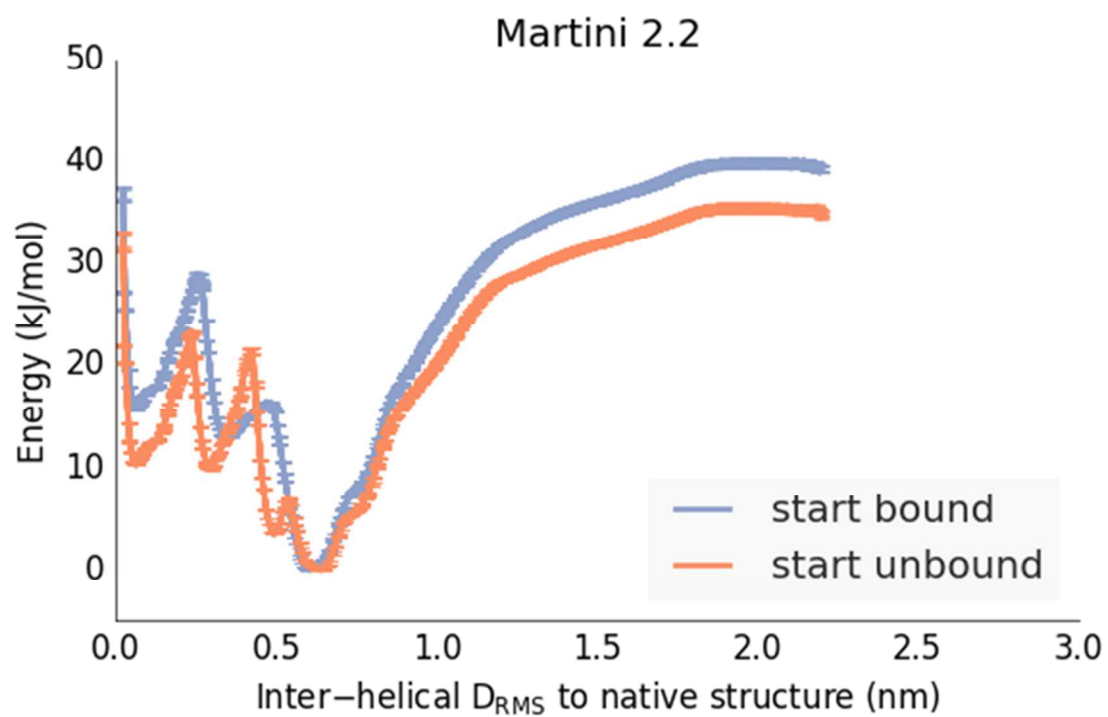

*SI Figure 6:*

Dimerization PMF along inter-helical  $D_{RMS}$  for GpA G83L mutant with Martini 2.2, starting from all bound and all unbound initial conditions.



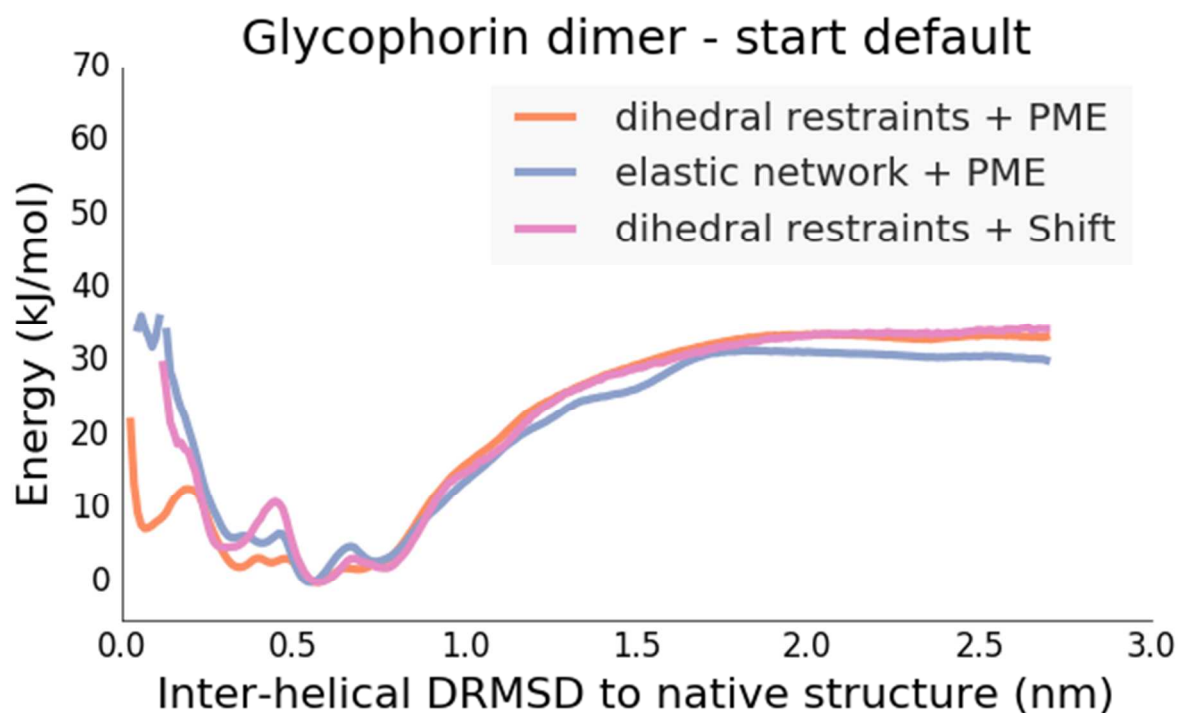

*SI Figure 7:*

Sensitivity of the GpA dimerization PMF to the choice of secondary structure restraint (dihedral vs. elastic network) and electrostatic treatment (PME vs. shifted) within Martini, starting with the replicas uniformly spaced along the reaction coordinate.

#### Input/setup files and code

Simulation setup files for ANT, Kir2.2 and GpA systems can be obtained from:

<https://github.com/bestlab/SamplingPaper>

The modified version of plumed (2.2-hrex) used to run the simulations is in available at:

<https://github.com/bestlab/plumed2/tree/intermolecular-drmsd>
